# Supplementary material for: Genomics and metatranscriptomics of biogeochemical cycling and degradation of lignin-derived aromatic compounds in thermal swamp sediment
Source: PubMed Central journal article supplement (PMC8027834; doi:10.1038/s41396-020-00820-x), 2020-11-02
Supplement: 41396_2020_820_MOESM2_ESM.pdf [file 41396_2020_820_MOESM2_ESM.pdf]

1 Genomics and metatranscriptomics of biogeochemical cycling and degradation of lignin-derived  
2 aromatic compounds in thermal swamp sediment

3

4 David J. Levy-Booth<sup>1</sup>, Ameena Hashimi<sup>1</sup>, Raphael Roccor<sup>1</sup>, Liyang Liu<sup>2</sup>, Scott Renneckar<sup>2</sup>, Lindsay D.  
5 Eltis<sup>1</sup>, William W. Mohn<sup>1\*</sup>

6 1. Department of Microbiology and Immunology, The University of British Columbia, Vancouver,  
7 Canada

8 2. Department of Wood Science, The University of British Columbia, Vancouver, Canada

9

10 Running title: Aromatic catabolism in a thermal metatranscriptome

11

12 \*To whom correspondence should be addressed: William W. Mohn, Department of Microbiology and Immunology,  
13 Life Sciences Institute, The University of British Columbia, 2350 Health Sciences Mall, Vancouver, BC, V6T 1Z3,  
14 Canada. Tel.: +1- 604-822-4285; Fax: +1-604-822-6041; E-mail: [wmohn@mail.ubc.ca](mailto:wmohn@mail.ubc.ca)

15

16 **Supplementary Methods**

## 17 **Additional sampling and 16S rRNA sequencing**

18 About 500 ml of organic biofilms were sampled (3×) from Alpha and Epsilon pools, and  
19 moderately-warmed, sandy Melanic Brunisol soil (17°C) was collected adjacent to Delta pool.  
20 The V4 region of the prokaryotic small ribosomal subunit (16S rRNA) gene was amplified,  
21 prepared, sequenced using MiSeq, and analyzed using standard protocols (1–4) by Microbiome  
22 Insights Inc. (Vancouver, Canada).

## 23 **Preparation of enzymatic mild acidolysis lignin (EMWL)**

24 The wood chips were ground to pass a 20 mesh using a Wiley mill, following subsequent  
25 treatment to remove extractives based on an ASTM standard procedure (5,6). These extractive-  
26 free wood fiber was subjected to rotary ball milling (Retsch PM200) at 600 rpm for 6 hours at 10  
27 min intervals with 5 min interval breaks. Ball milled wood powders was then suspended in pH  
28 4.8 citrate buffer at a 2% concentration for enzymatic hydrolysis. In the mixture, 5% (w/w)  
29 cellulase and xylanase enzyme (Cellic CTec 3 and HTEE) and another 2% (w/v) Tween20 as a  
30 detergent and emulsifier were measured and added as described by Wu et al. (7). The mixture  
31 was then incubated in a shaker at 50 °C for 48 hrs, operating at 150 rpm. The enzymatically  
32 hydrolyzed residue, known as crude lignin, was filtered out, thoroughly washed with water, and  
33 freeze-dried. To further remove the sugar, 5 g dried crude lignins were extracted by 1000 ml  
34 aqueous acid dioxane (96:4 v/v, pH=2) at their boiling point (100 °C) for 2 hours under a flow of  
35 nitrogen. The mixture was separated by centrifugation. The supernatants, containing lignin in  
36 aqueous dioxane, was neutralized with sodium bicarbonate (NaHCO<sub>3</sub>), and then added dropwise  
37 into 1000 ml acidic water (pH=2). The precipitated lignin was separated by filtration (0.45 µm  
38 PTFE membrane) and washed twice with acidic water and distilled water. The resultant  
39 enzymatic mill acidolysis lignin (EMAL) was dried and stored in a vacuum oven at 50 °C (8).

## 40 **Lignin analysis**

41 Lignin substrates were analyzed using <sup>13</sup>C nuclear magnetic resonance (NMR) and 2D  
42 heteronuclear single quantum coherence (HSQC) NMR analysis (9–11). Briefly, ~300 mg  
43 substrates underwent acetylation by dissolving them in pyridine/acetic anhydride (Fisher Sci.) (v,  
44 1:1), washing thrice with 0.1 mol l<sup>-1</sup> HCl, and vacuum drying prior to analysis. Acetylated and  
45 untreated lignin was dissolved in DMSO (Sigma Aldrich), mixed with 50 mg/ml chromium (III)

46 (Sigma Aldrich), and analyzed by 300 HMz NMR (Bruker Corp.) using acquisition parameters:  
47 2000 scanning number, 1.4 s acquisition time, 2 s delay time, and 7  $\mu$ s pulse length. The obtained  
48 spectrum were processed as in (12). The  $^{13}\text{C}$ - $^1\text{H}$  spectrum was acquired with following  
49 parameters: matrices of 4 data points for the  $^1\text{H}$  and 256 data points for  $^{13}\text{C}$  were collected with  
50 an interscan delay (D1) of 750 ms, 4 number of scans, and spectral width from 12.67 to -3.30  
51 ppm. The obtained spectrum was refereed using the DMSO-d<sub>6</sub> signal (2.50/39.5 ppm). Topspin  
52 3.5 software was adopted to process the spectrum, including Fourier transform, baseline  
53 correction, and calibration. For semi-quantitative analysis, we defined the area of the G2  
54 spectrum as the internal standard with a value of 100 aromatic units (100 Ar). All the other  
55 linkages and functional group were calculated as a number of 100 Ar.

## 56 **Liquid chromatography**

57 The thawed supernatant samples from the lignin incubations were acidified with acetic acid  
58 (10% final volume), centrifuged for 5 min at 21,000 x g and filtered (0.2  $\mu$ m). Samples were  
59 analyzed by HPLC using an Agilent 1100 Series separations module equipped with a photodiode  
60 array detector. One-hundred  $\mu$ L of sample was injected onto a Kinetex EVO 5  $\mu$ m C18 column  
61 (100  $\text{\AA}$ , 150 x 3.0 mm; Phenomenex, Torrance, U.S.A.), operated at a flow rate of 0.7 mL/min  
62 and equilibrated with aqueous 0.1% formic acid with 0.5% acetonitrile (buffer A). Buffer B  
63 contained 90% acetonitrile with 0.1% formic acid. The elution gradient was as following: 0-  
64 2 min, 0 to 10% buffer B; 2-15 min, 10 to 20% buffer B; 15-16 min, 20% buffer B; 16-17 min,  
65 20 to 100% buffer B; 17-21 min, 100% buffer B; 21-22 min, 100 to 0% buffer B; 22-25 min, 0%  
66 buffer B. The detector was set at 280 nm. Authentic standards of 2,6-dimethoxy-1,4-  
67 benzoquinone, vanillic acid, syringic acid, vanillin, and syringaldehyde were used to identify  
68 monoaromatic compounds in the samples. Their retention times were 5.65 min, 6.12 min, 6.66  
69 min, 7.39 min, and 8.28 min, respectively. Standard curves were obtained by injecting between 1  
70 and 20  $\mu$ M of authentic standards in 50 mM sodium phosphate buffer (dilutions derived from  
71 100 mM stocks dissolved in DMSO).

## 72 **Manual refinement of MAGs**

73 High-quality bins (>90% completeness, < 10% contamination) were manually inspected for  
74 contig placement, gene content, and taxonomy. Misclustered contigs were identified with k-  
75 means clustering. Those that exhibited conflicting coverage patterns or contained duplicate SCGs

76 were removed from the final 39 assemblies, which corrected the taxonomy of some assemblies.  
77 For each bin, contig coverage across libraries was subject to average linkage hierarchical  
78 clustering, which was visualized alongside contig consensus taxonomy and presence of duplicate  
79 marker genes to manually identify contigs that had a high likelihood of being binned  
80 erroneously. These contigs were removed from final metagenome-assembled genomes (MAGs).

### 81 **Custom HMM thresholds**

82 To facilitate the identification aromatic compound degradation and anoxygenic photosystem  
83 genes, custom thresholds were set for 25 KEGG HMMs [Supplementary Data 1]. The genomes  
84 from this study and all 24,706 species-cluster representative genomes in the GTDB (13) were  
85 assessed using the 25 KEGG HMMs and HMMER 3.2.1 (<http://hmmer.org/>). For each HMM,  
86 hits with bitscores  $\geq 20\%$  of the default threshold value were aligned using MAFFT 7.407 (--  
87 auto), trimmed using TrimAl 1.2rev59 (-gt 0.30), and their phylogeny was calculated using  
88 FastTree 2.1.10 (--fastest). Phylogenetically modified HMM thresholds were set using the highest  
89 score obtained by proteins outside of the clade containing all significant hits, and these modified  
90 thresholds were used in the final analyses.

### 91 **Calculating genomic abundance**

92 Quality filtered read files from metagenome and transcriptome libraries were aligned to the 39  
93 assembled genomes with BBMap at >97% identity. To capture potential biodiversity missed by  
94 the assembly approach, unmapped reads were subsequently aligned with the 351 remaining  
95 contig bins and 24,668 GTDB genomic fasta files. Reads mapping to multiple genomes were  
96 assigned as fractional counts. Genomes with >500 counts and >1% coverage were included in  
97 subsequent genomic analysis. Feature scaling was used to normalize counts in each metagenome  
98 library between 0 and 1 for all genomes independently to visualize the distribution of each  
99 genome across temperatures using the equation (1):

$$100 \quad (1) \quad Counts_{norm.} = \frac{x - \min(x)}{\max(x) - \min(x)}$$

- 101 1. Apprill A, McNally S, Parsons R, Weber L. Minor revision to V4 region SSU rRNA 806R gene primer  
102 greatly increases detection of SAR11 bacterioplankton. *Aquat Microb Ecol.* 2015 Jun 4;75(2):129–37.

- 103 2. Caporaso JG, Lauber CL, Walters WA, Berg-Lyons D, Huntley J, Fierer N, et al. Ultra-high-throughput  
104 microbial community analysis on the Illumina HiSeq and MiSeq platforms. *ISME J.* 2012  
105 Aug;6(8):1621–4.
- 106 3. Schloss PD, Westcott SL, Ryabin T, Hall JR, Hartmann M, Hollister EB, et al. Introducing mothur:  
107 Open-Source, Platform-Independent, Community-Supported Software for Describing and  
108 Comparing Microbial Communities. *Appl Environ Microbiol.* 2009 Dec 1;75(23):7537–41.
- 109 4. Kozich JJ, Westcott SL, Baxter NT, Highlander SK, Schloss PD. Development of a Dual-Index  
110 Sequencing Strategy and Curation Pipeline for Analyzing Amplicon Sequence Data on the MiSeq  
111 Illumina Sequencing Platform. *Appl Environ Microbiol.* 2013 Sep 1;79(17):5112–20.
- 112 5. A.S.T.M., Standard Test Method for Preparation of Extractive-Free Wood. 2013.  
113
- 114 6. Liu, L.-Y.; Patankar, S. C.; Chandra, R. P.; Sathitsuksanoh, N.; Saddler, J. N.; Renneckar, S.,  
115 Valorization of Bark Using Ethanol–Water Organosolv Treatment: Isolation and Characterization of  
116 Crude Lignin. *ACS Sustainable Chemistry & Engineering* **2020**.  
117
- 118 7. Wu, J.; Chandra, R. P.; Kim, K. H.; Kim, C. S.; Pu, Y.; Ragauskas, A. J.; Saddler, J. N., Enhancing  
119 Enzyme-Mediated Hydrolysis of Mechanical Pulps by Deacetylation and Delignification. *ACS*  
120 *Sustainable Chemistry & Engineering* **2020**, 8 (15), 5847-5855.  
121
- 122 8. ANDERSON GUERRA, I. F., LUCIAN A. LUCIA, AND DIMITRIS S. ARGYROPOULOS, Comparative  
123 Evaluation of Three Lignin Isolation Protocols for Various Wood Species. *Journal of agricultural and*  
124 *food chemistry* **2006**, 54, 9696-9705.  
125
- 126 9. Das L, Li M, Stevens J, Li W, Pu Y, Ragauskas AJ, et al. Characterization and Catalytic Transfer  
127 Hydrogenolysis of Deep Eutectic Solvent Extracted Sorghum Lignin to Phenolic Compounds. *ACS*  
128 *Sustain Chem Eng.* 2018 Aug 6;6(8):10408–20.
- 129 10. Balakshin MY, Capanema EA, Santos RB, Chang H, Jameel H. Structural analysis of hardwood native  
130 lignins by quantitative <sup>13</sup>C NMR spectroscopy. *Holzforschung.* 2016 Feb 1;70(2):95–108.
- 131 11. Holtman KM, Chang H, Jameel H, Kadla JF. Quantitative <sup>13</sup>C NMR Characterization of Milled Wood  
132 Lignins Isolated by Different Milling Techniques. *J Wood Chem Technol.* 2006 Apr 1;26(1):21–34.
- 133 12. Liu L-Y, Cho M, Sathitsuksanoh N, Chowdhury S, Renneckar S. Uniform Chemical Functionality of  
134 Technical Lignin Using Ethylene Carbonate for Hydroxyethylation and Subsequent Greener  
135 Esterification. *ACS Sustain Chem Eng.* 2018 Sep 4;6(9):12251–60.
- 136 13. Parks DH, Chuvochina M, Waite DW, Rinke C, Skarshewski A, Chaumeil P-A, et al. A standardized  
137 bacterial taxonomy based on genome phylogeny substantially revises the tree of life. *Nat*  
138 *Biotechnol.* 2018;36(10):996–1004.
